# Supplementary material for: Reduced Incidence of Carbapenem-Resistant Klebsiella pneumoniae Infections in Cardiac Surgery Patients after Implementation of an Antimicrobial Stewardship Project
Source: MDPI journal article supplement (doi:10.3390/antibiotics8030132), 2019-08-28
Supplement: s1 [file s1]

Supplementary figure S1. Timing of carbapenem-resistant *Klebsiella pneumoniae* colonization

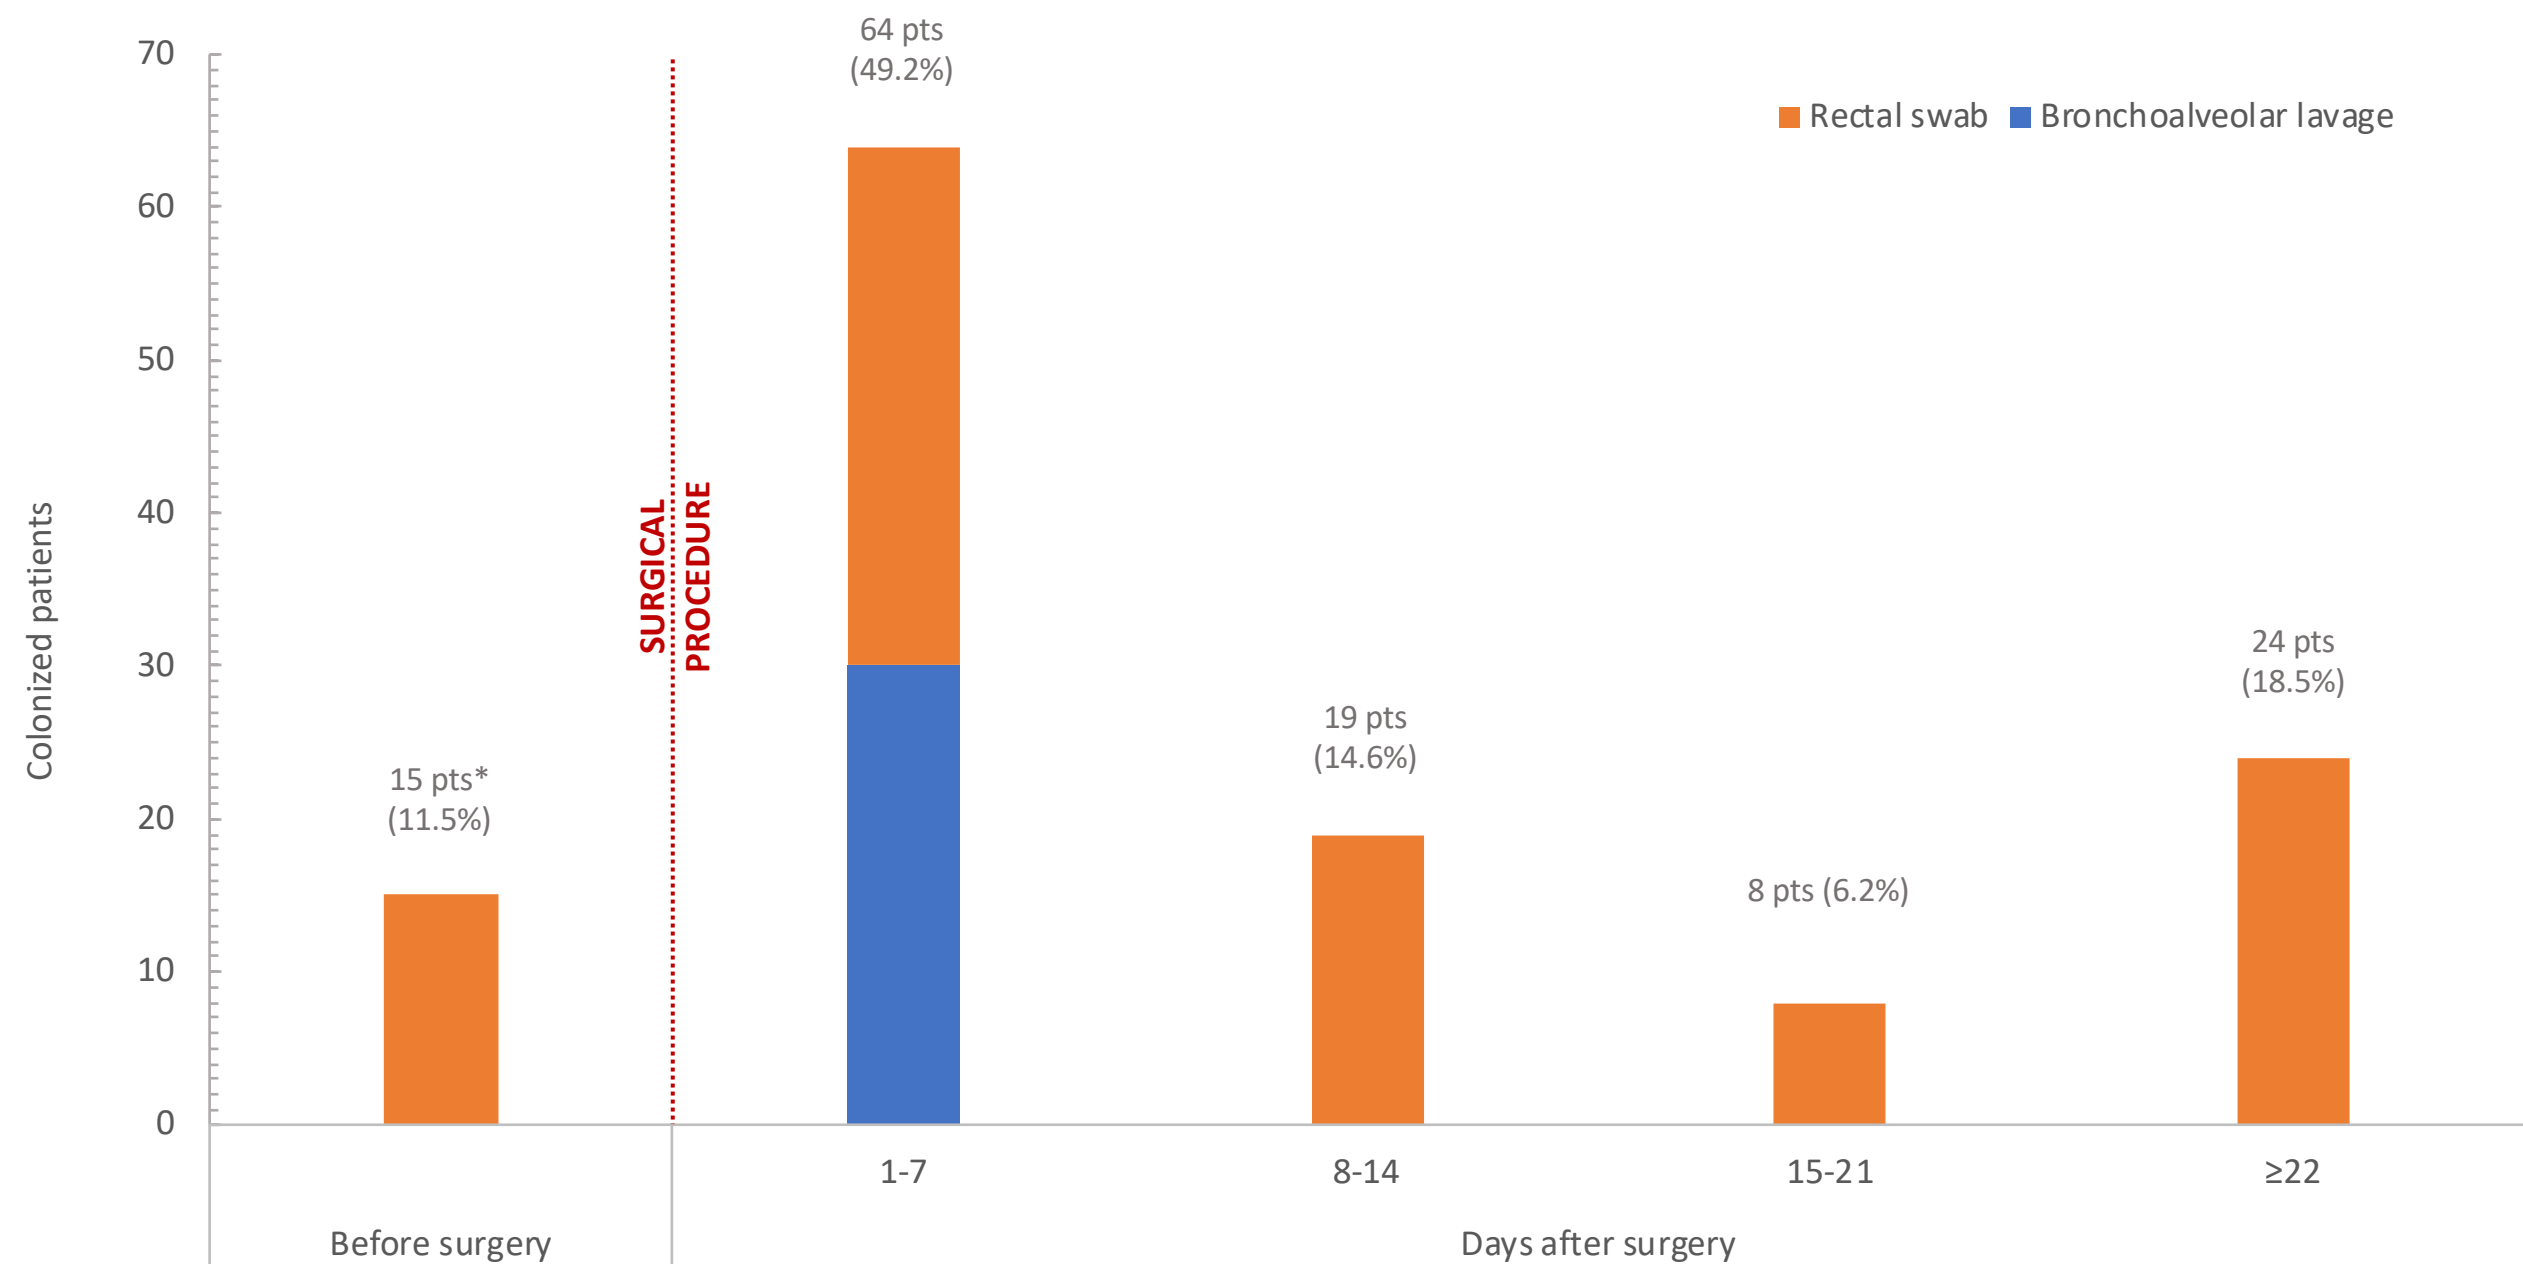

\* in 7 cases colonization was known at hospital admission
