# Supplementary material for: Reduced Incidence of Carbapenem-Resistant Klebsiella pneumoniae Infections in Cardiac Surgery Patients after Implementation of an Antimicrobial Stewardship Project
Source: MDPI journal article supplement (doi:10.3390/antibiotics8030132), 2019-08-28
Supplement: s1 [file s1]

**Supplementary table S1. Observed types of postoperative carbapenem-resistant *Klebsiella pneumoniae* infections during the study period.**

| Year                 | Bloodstream infections |                            | Isolated pneumonia | Urinary tract infection | Surgical wound infections | Total per year |
|----------------------|------------------------|----------------------------|--------------------|-------------------------|---------------------------|----------------|
|                      | Isolated               | With concomitant pneumonia |                    |                         |                           |                |
| <b>2014</b>          | 7                      | 4                          | 14                 | 3                       | 4                         | 32             |
| <b>2015</b>          | 3                      | 0                          | 2                  | 0                       | 4                         | 9              |
| <b>2016</b>          | 5                      | 0                          | 2                  | 1                       | 0                         | 8              |
| <b>2017</b>          | 0                      | 1                          | 0                  | 0                       | 1                         | 2              |
| <b>2018</b>          | 1                      | 0                          | 0                  | 0                       | 0                         | 1              |
| <b>Entire period</b> | 16                     | 5                          | 18                 | 4                       | 9                         | 52             |
