# Supplementary material for: Reduced Incidence of Carbapenem-Resistant Klebsiella pneumoniae Infections in Cardiac Surgery Patients after Implementation of an Antimicrobial Stewardship Project
Source: MDPI journal article supplement (doi:10.3390/antibiotics8030132), 2019-08-28
Supplement: s1 [file s1]

Supplementary figure S2. Trends in the proportion or median value of other previously described, potential predictors of carbapenem-resistant *Klebsiella pneumoniae* infections in cardiac surgery patients

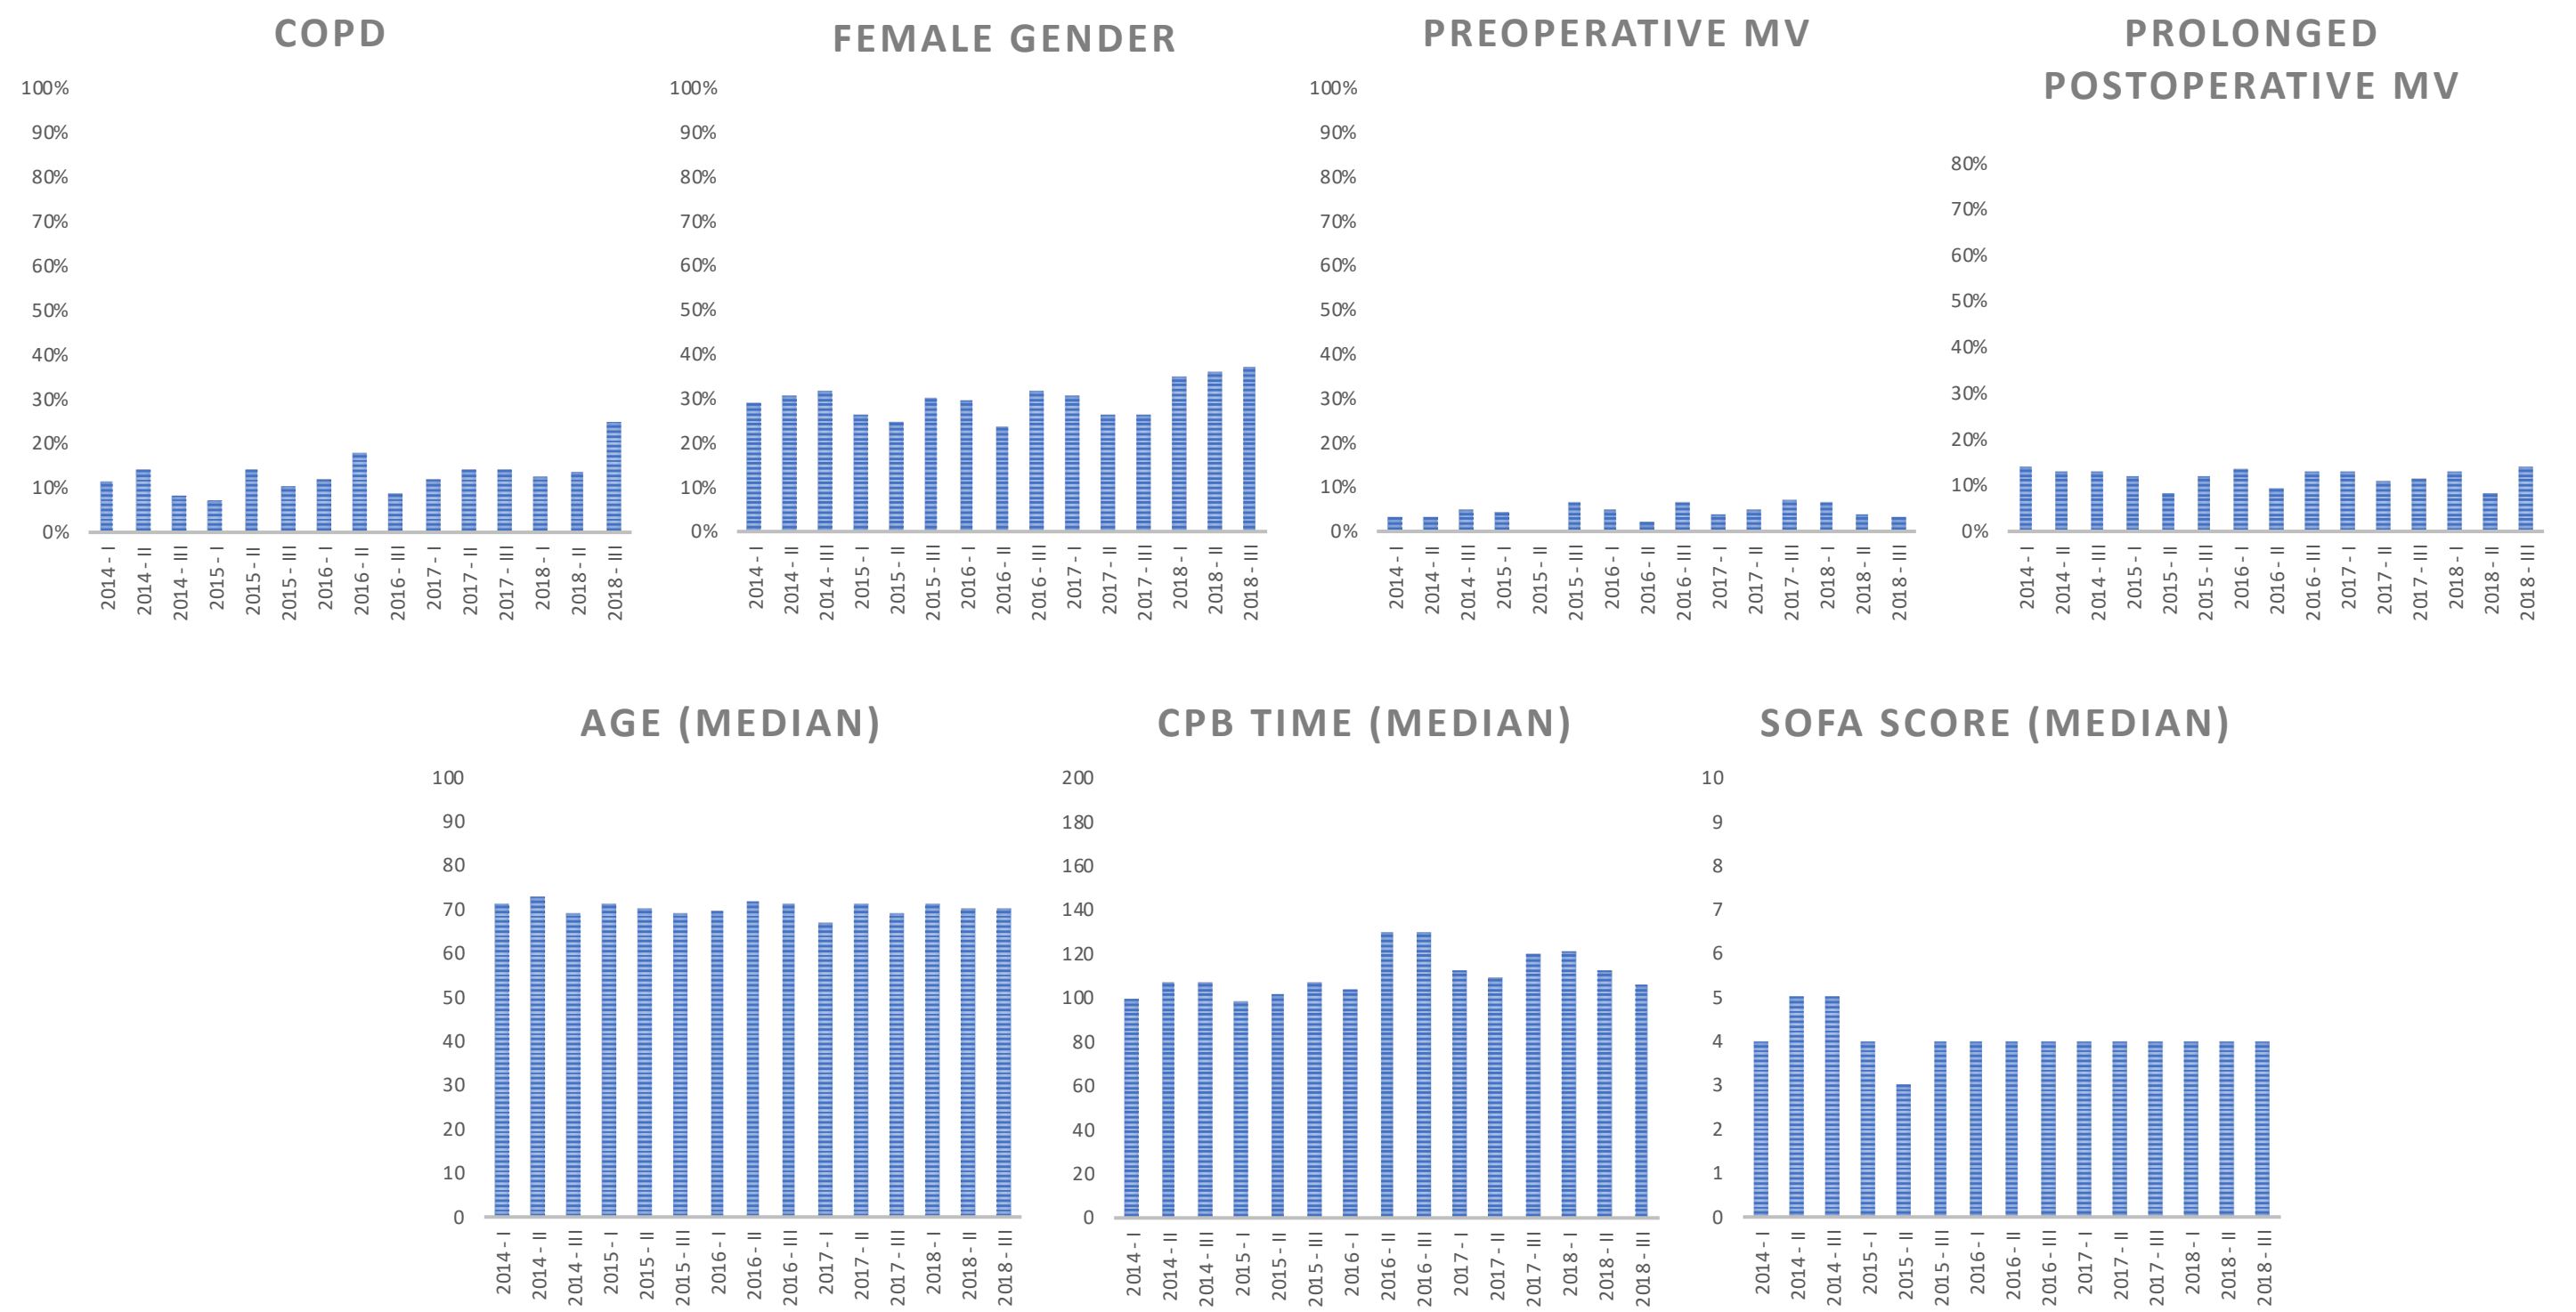

**Figure S2 legend.** Overall, 2261 patients underwent open-heart surgery during the study period. Trends over 4-month periods are reported as proportions (percentages) unless otherwise indicated. COPD, chronic obstructive pulmonary disease; MV, mechanical ventilation, SOFA, sequential organ failure assessment. CPB, cardiopulmonary bypass. Statistically significant upward trends were observed for COPD ( $p = 0.005$ ) and CPB time ( $p < 0.001$ ), whereas a statistically significant downward trend was observed for patients' age ( $p = 0.044$ ). No other statistically significant trends were observed (female gender,  $p = 0.115$ ; preoperative mechanical ventilation,  $p = 0.266$ ; prolonged postoperative mechanical ventilation,  $p = 0.728$ ); SOFA score,  $p = 0.339$ ).
